# Supplementary material
Source: PubMed Central journal article supplement (PMC3438353)
Supplement: NIHMS399678-supplement-05.pdf [file NIHMS399678-supplement-05.pdf]

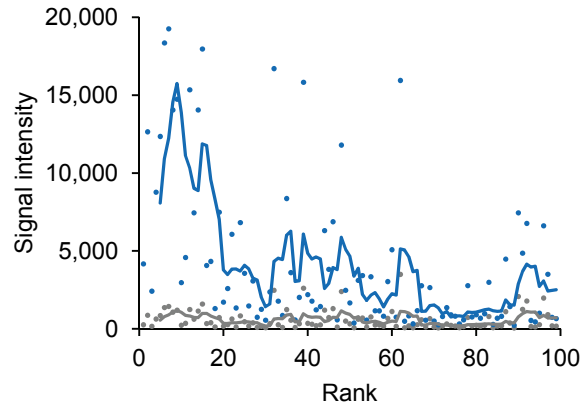

**Fig. S2.** Microarray signal intensity distribution for the top 100 hemocyte-enriched transcripts from *Aedes aegypti* (naïve condition). Signal intensities from hemocyte and carcass samples are colored blue and grey, respectively. The trend lines were fitted by moving average with a period of 5.
