# Supplementary material
Source: PubMed Central journal article supplement (PMC3438353)
Supplement: NIHMS399678-supplement-06.pdf [file NIHMS399678-supplement-06.pdf]

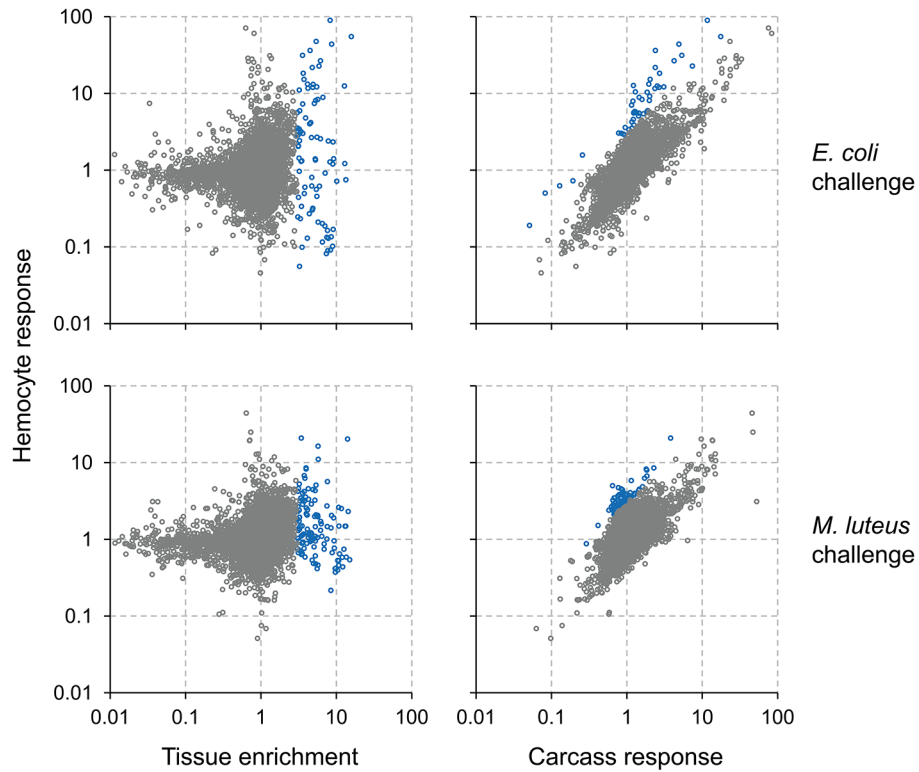

**Fig. S3.** Hemocyte response profiles were compared to tissue enrichment and carcass response profiles for *Aedes aegypti*. The axes indicate expression ratios. Pairing of expression ratios further resolved the hemocyte response profiles, highlighting transcriptional changes distinctive of hemocytes. Transcripts enriched in hemocytes after bacterial challenge or transcripts displaying a differential response in hemocytes relative to the carcass are colored blue ( $P < 0.01$  and fold change  $> 3$ ).
