# Supplementary material
Source: PubMed Central journal article supplement (PMC3438353)
Supplement: NIHMS399678-supplement-07.pdf [file NIHMS399678-supplement-07.pdf]

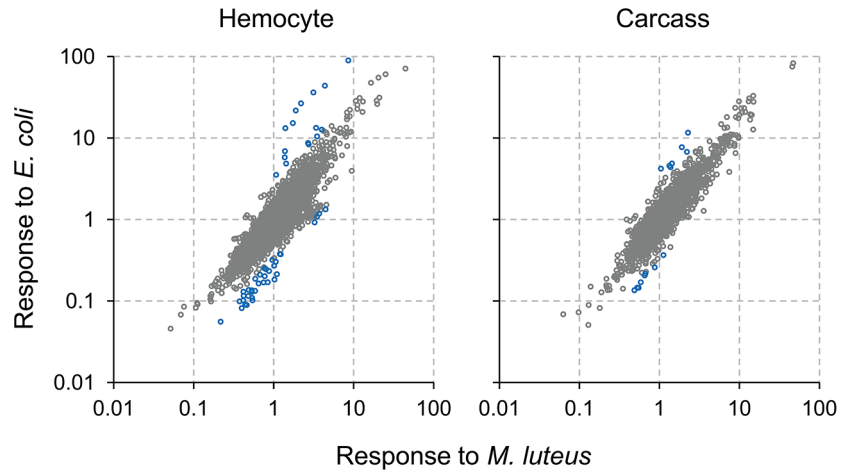

**Fig. S4.** *Aedes aegypti* hemocyte and carcass response to *Escherichia coli*- and *Micrococcus luteus*-challenge. The axes indicate expression ratios. Transcripts displaying a differential response to *E. coli*- relative to *M. luteus*-challenge are colored blue ( $P < 0.01$  and fold difference  $> 3$ ).
